# Supplementary material
Source: Springer Nature journal article supplement (https://www.springermedizin.de/resource/supplementary/12885_2013_4535_MOESM3_ESM.pdf/9466584)

A

HER2 CB11

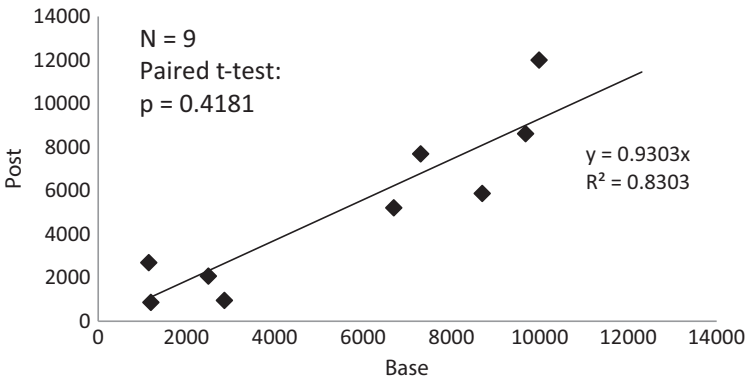

B

pHER2 PN2A

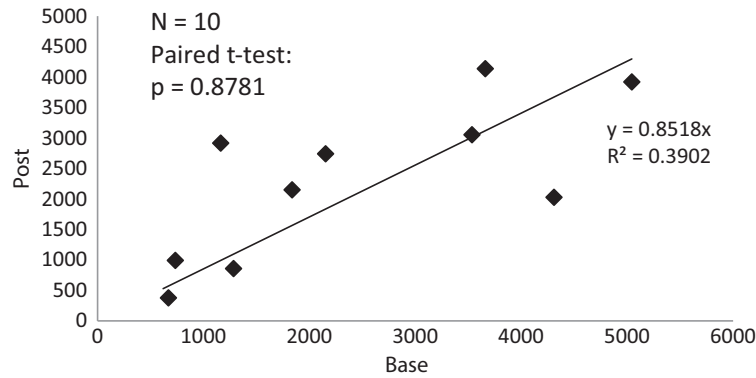

Supplement: MOESM3 [file 9466584]
